# Supplementary material
Source: PubMed Central journal article supplement (PMC2661954)

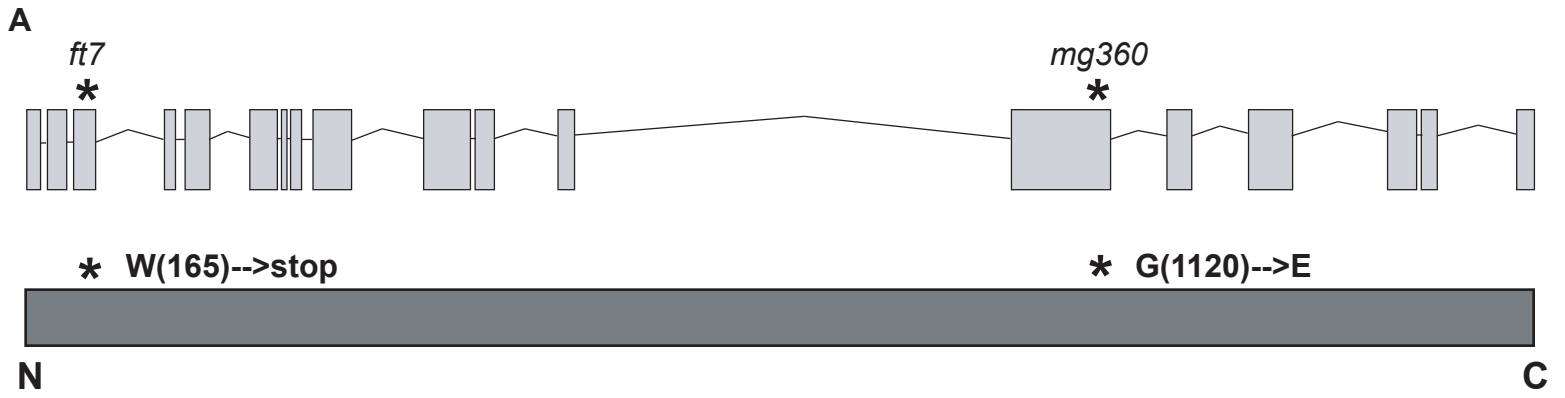

**B**

\* *mg360* G1120E

|                      |      |                |             |                                               |             |
|----------------------|------|----------------|-------------|-----------------------------------------------|-------------|
| <i>H. sapiens</i>    | 910  | RTPDLDKWE      | EIKK        | LKASLWALGNIGSSNWGLNLLQEENVIPDILKLAQ           | CEVLSIRGTCV |
| <i>M. musculus</i>   | 910  | RTPDLDKWE      | DIKK        | LKASLWALGNIGSSNWGLNLLQEENVIPDILKLAQ           | CEVLSIRGTCV |
| <i>D. rerio</i>      | 910  | RCPLLDKWE      | GIKQ        | LKALWALGNIGSNWGLNLLQEENVIPDIVALAH             | CEVLSIRGTCV |
| <i>D. discoideum</i> | 943  | QDPTAKQLDKR    | ---         | ASLIAIGHIGSSVDGYSFVKESDTIKLLIGIAEKSQCLALRSTCF |             |
| <i>S. cerevisiae</i> | 1136 | NMATVENAKEILD  | DLKAALWCVGF | IGSTELGIGLLDNYSLVEDITEVAYNASVTSVRFTAF         |             |
| <i>C. elegans</i>    | 1096 | LLSICKTGKCFEET | KASLLAVSS   | IGSTDGGFEILP-ADAVPVVIKIAEEHPVLTVRGIAF         |             |

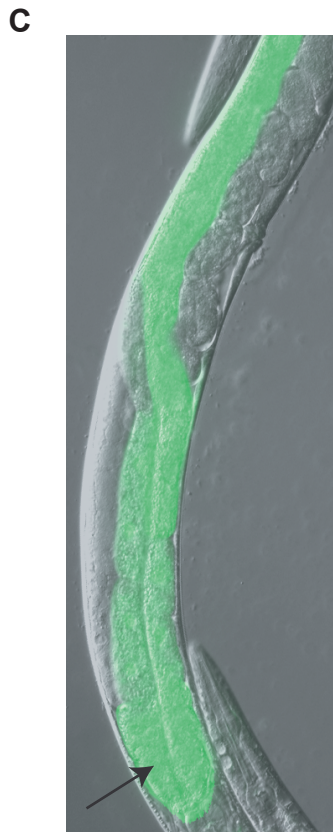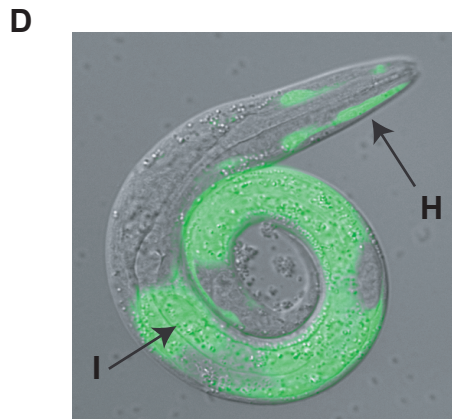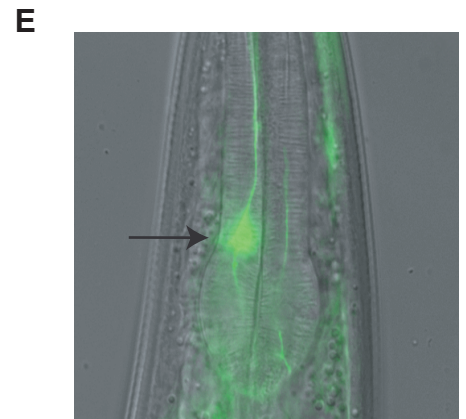

Supplement: pbio.1000060.sg001.pdf [file pbio.1000060.sg001.pdf]
