# Supplementary material
Source: PubMed Central journal article supplement (PMC2661954)

A

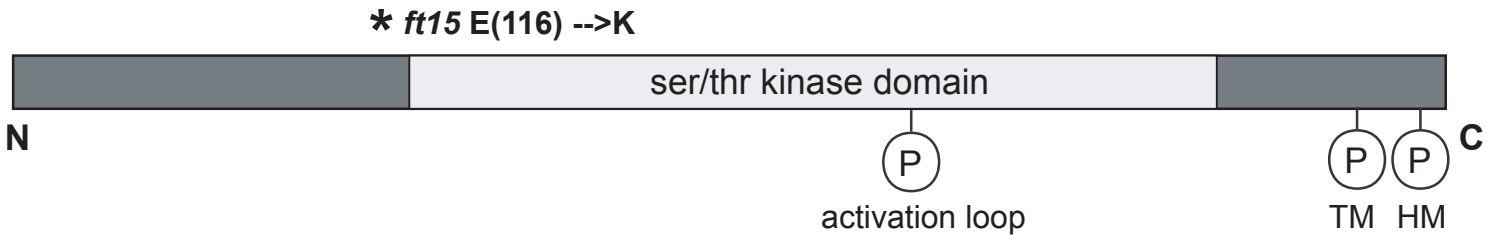

B

|                         |     |                                                            |
|-------------------------|-----|------------------------------------------------------------|
| <i>sgk1_Hsapiens</i>    | 72  | <b>NPSPPPSP</b> -----SQQINLGPSSNPHAKPSDFHFLKVIKGSFGKVLL    |
| <i>sgk1_Mmusculus</i>   | 72  | <b>NPSPPPSP</b> -----SQQINLGPSSNPHAKPSDFHFLKVIKGSFGKVLL    |
| <i>sgk1_Drerio</i>      | 74  | <b>NPSPPPSP</b> -----SQQINLGPSSNPTAKPSDFDFLKVIGKGSFGKVLL   |
| <i>ypk2_Scerevisiae</i> | 301 | KIDSAAQIRLYNHHWISLERGYGKLNITVDYKPSKPKPLSIDDFDLKVIKGSFGKVMQ |
| <i>sgk1_Celegans</i>    | 99  | <b>HLESPPDD</b> -----ENNVDLGPSEKRTATANDFDLTTIGKGSFGRVYQ    |

**\* *ft15* E(116) -->K**

|                         |     |                                                                                                                               |
|-------------------------|-----|-------------------------------------------------------------------------------------------------------------------------------|
| <i>sgk1_Hsapiens</i>    | 115 | <b>ARHKAE</b> EVFYAVKVLQKKA <del>IL</del> KKKKEEKHIMSERNVLLK <del>NV</del> KHPFLVGLHFSFQTADKLYF                               |
| <i>sgk1_Mmusculus</i>   | 115 | <b>ARHKAE</b> EVFYAVKVLQKKA <del>IL</del> KKKKEEKHIMSERNVLLK <del>NV</del> KHPFLVGLHFSFQTADKLYF                               |
| <i>sgk1_Drerio</i>      | 117 | <b>ARHRS</b> DEK <del>F</del> YAVKVLQKKA <del>IL</del> KKKKEEKHIMSERNVLLK <del>NV</del> KHPFLVGLH <del>Y</del> SFQTADKLYF     |
| <i>ypk2_Scerevisiae</i> | 361 | VRKKDTQKIYAL <del>K</del> AL <del>R</del> KAYIVSKCEVTE <del>T</del> LAERTV <del>L</del> AR-VDCPFIVPLKFSFQSP <del>E</del> KLYL |
| <i>sgk1_Celegans</i>    | 142 | <b>VRHKET</b> KKIYAMKILSKEHIRKKNEV <del>R</del> EVMAERNVLI <del>N</del> NP <del>F</del> KHPFLVSLHFSFQ <del>N</del> KEKLYF     |

C

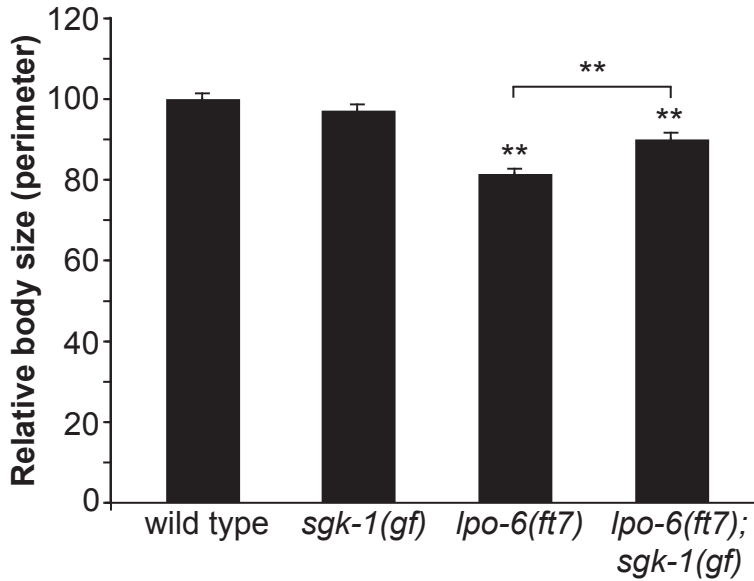

D

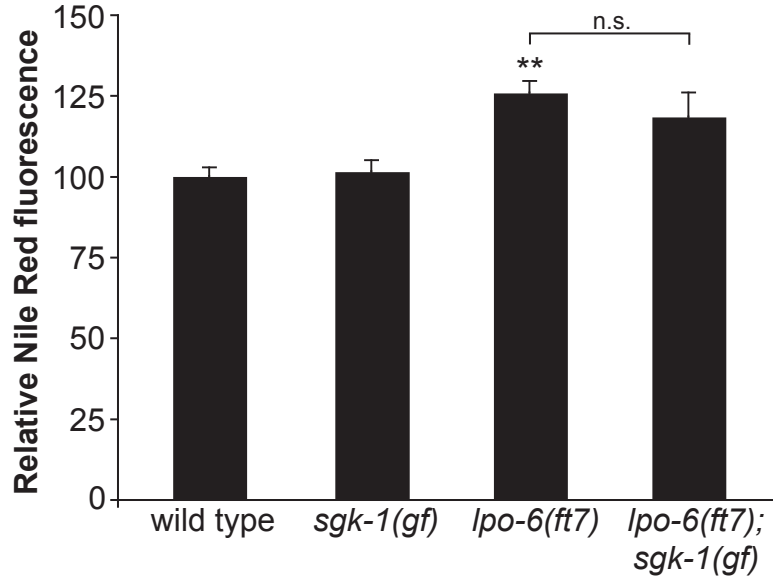

Supplement: pbio.1000060.sg004.pdf [file pbio.1000060.sg004.pdf]
