# Supplementary material
Source: PubMed Central journal article supplement (PMC2661954)

**A**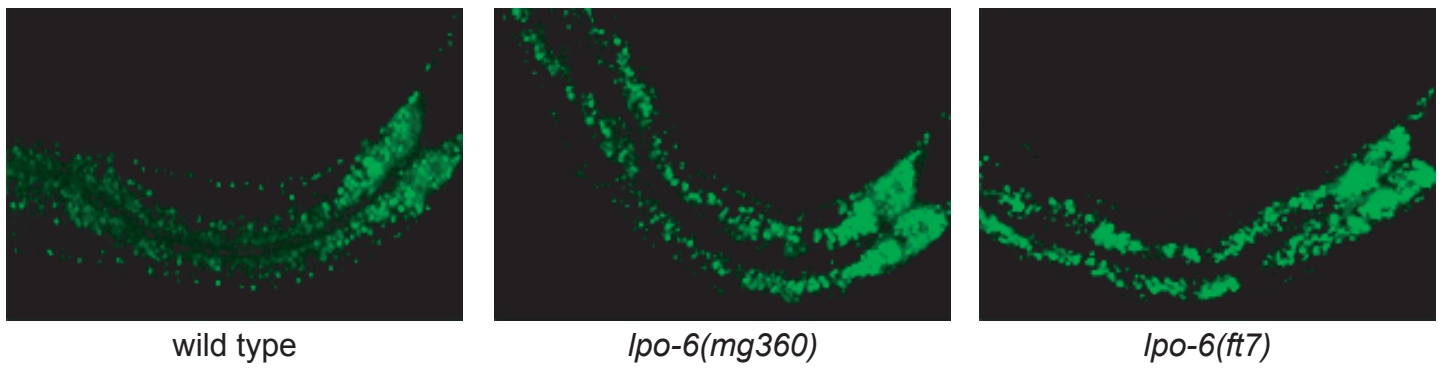**B**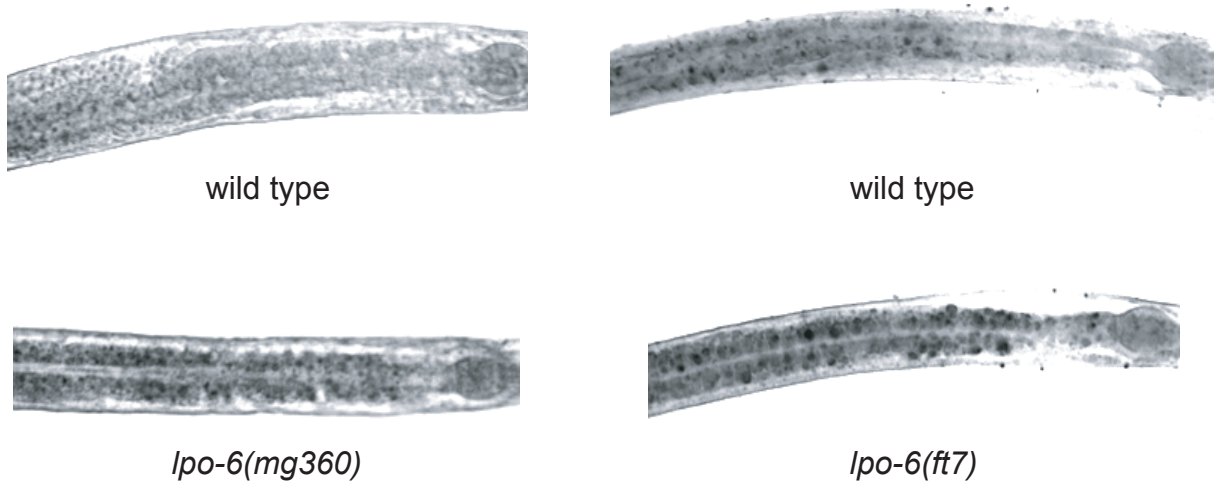**C**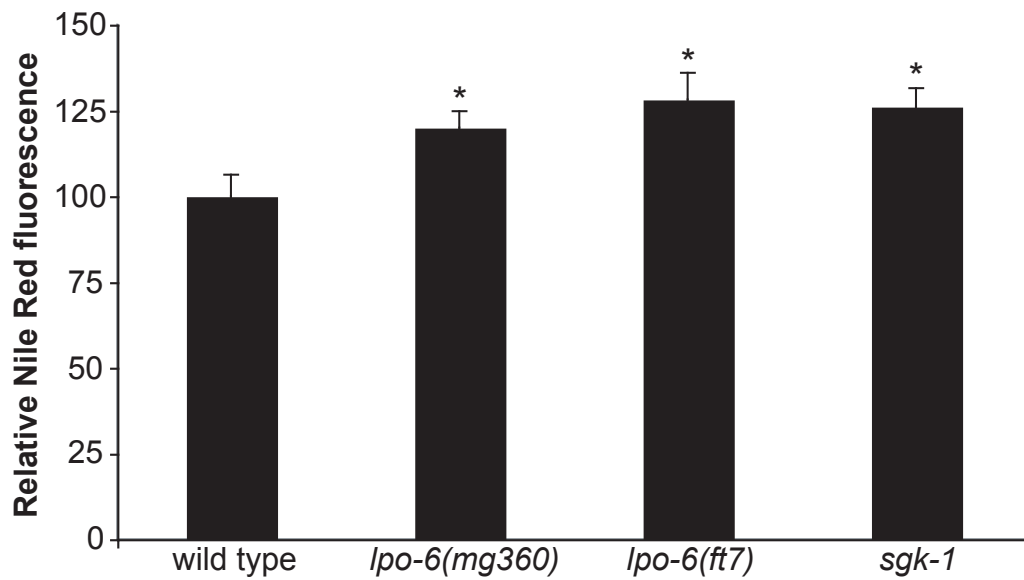

Supplement: pbio.1000060.sg002.pdf [file pbio.1000060.sg002.pdf]

**A**

wild type  
on  
vector RNAi

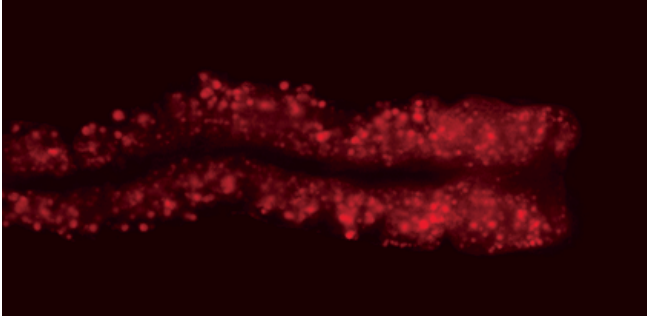

wild type  
on  
*Ist-8* RNAi

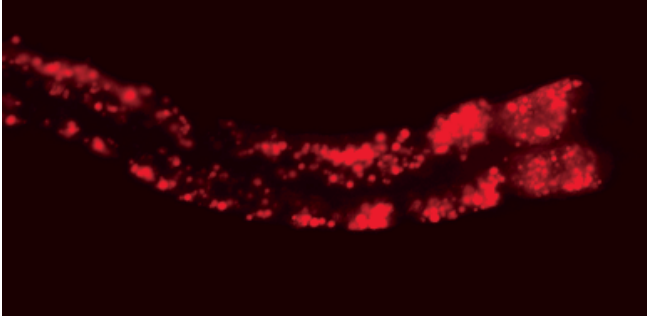

**B**

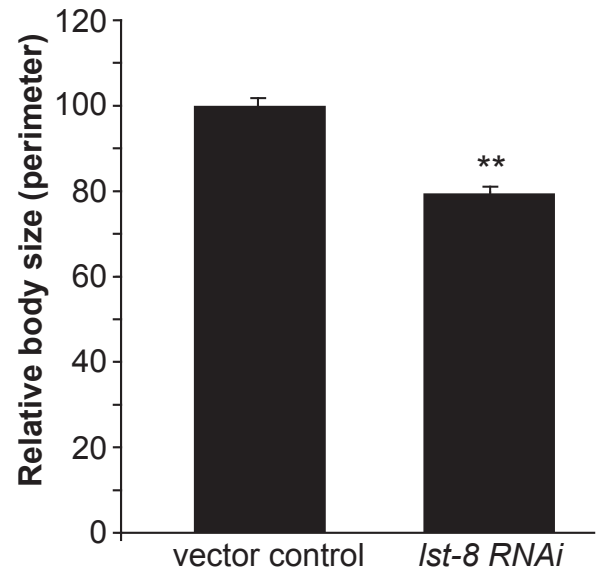

Supplement: pbio.1000060.sg003.pdf [file pbio.1000060.sg003.pdf]
